# Supplementary material for: Definition of the Prognostic Role of MGMT Promoter Methylation Value by Pyrosequencing in Newly Diagnosed IDH Wild-Type Glioblastoma Patients Treated with Radiochemotherapy: A Large Multicenter Study
Source: MDPI journal article supplement (doi:10.3390/cancers14102425), 2022-05-13
Supplement: s1 [file s1]

# Supplementary Material: Definition of the Prognostic Role of MGMT Promoter Methylation Value by Pyrosequencing in Newly Diagnosed IDH Wild-Type Glioblastoma Patients Treated with Radiochemotherapy: A Large Multicenter Study

Mario Caccese \*, Matteo Simonelli, Veronica Villani, Simona Rizzato, Tamara Ius, Francesco Pasqualetti, Marco Russo, Roberta Rudà, Rosina Amoroso, Luisa Bellu, Roberta Bertorelle, Francesco Cavallin, Angelo Dipasquale, Mariantonia Carosi, Stefano Pizzolitto, Daniela Cesselli, Pasquale Persico, Beatrice Casini, Matteo Fassan, Vittorina Zagonel and Giuseppe Lombardi

## Supplemental Material

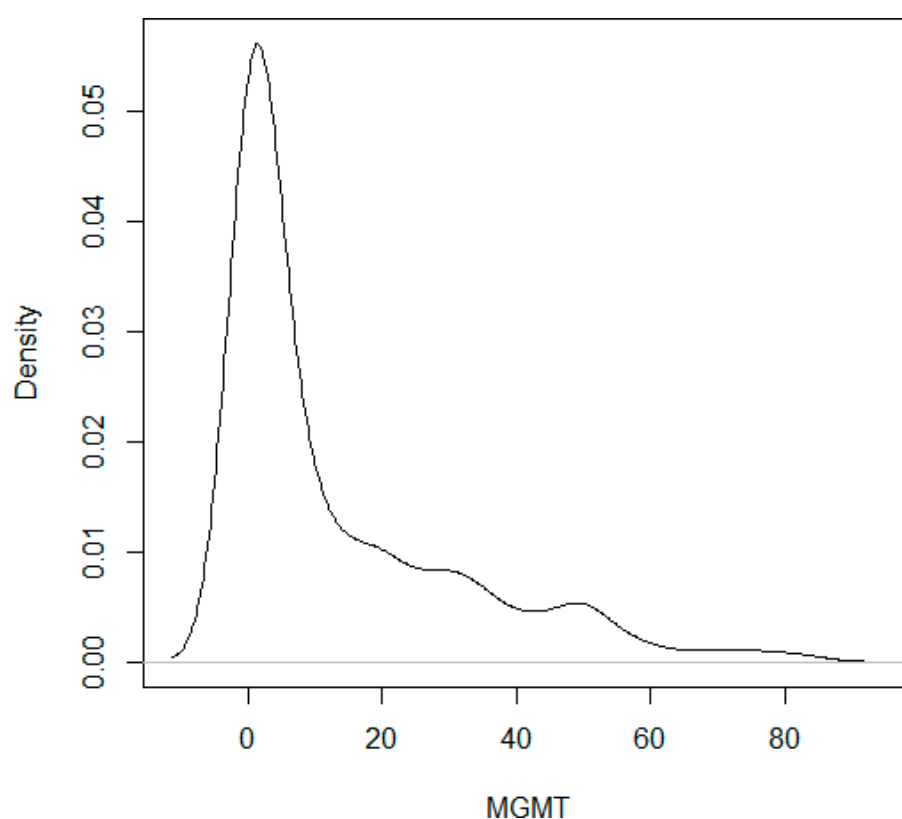

**Figure S1:** Distribution of MGMT promoter methylation in the study sample

**Table S1.** Characteristics of glioblastoma patients according to MGMT methylation status (<15% and ≥15%) by pyrosequencing.

| Variable                             | MGMT | methylation MGMT | methylation | <i>p</i> -value |
|--------------------------------------|------|------------------|-------------|-----------------|
|                                      |      | <15%             | ≥15%        |                 |
| <i>n</i>                             |      | 401              | 190         | -               |
| Age at diagnosis, years <sup>a</sup> |      | 60 (52–67)       | 61 (52–68)  | 0.81            |
| Females                              |      | 124 (30.9)       | 78 (41.1)   | 0.02            |
| Males                                |      | 277 (69.1)       | 112 (58.9)  |                 |
| ECOG PS:                             |      |                  |             | 0.02            |
| 0                                    |      | 170 (42.4)       | 85 (44.7)   |                 |
| 1                                    |      | 173 (43.1)       | 93 (49.0)   |                 |

|                               |            |            |      |
|-------------------------------|------------|------------|------|
| 2                             | 58 (14.5)  | 12 (6.3)   |      |
| Type of surgery: <sup>b</sup> |            |            | 0.98 |
| Radical                       | 166 (41.6) | 80 (42.1)  |      |
| Non-radical                   | 233 (58.4) | 110 (57.9) |      |
| Second surgery                | 67 (17.4)  | 31 (16.8)  | 0.95 |

Data expressed as *n* (%) or a median (interquartile range). Data not available <sup>b</sup>2 and <sup>c</sup>20 patients. MGMT methylation was 0% in 94 males and 51 females.
